# Supplementary material for: Hypoxia within subcutaneously implanted macroencapsulation devices limits the viability and functionality of densely loaded islets
Source: PubMed Central journal article supplement (PMC11235299; doi:10.3389/frtra.2023.1257029), 2023-11-17
Supplement: Datasheet1.pdf [file Datasheet1.pdf]

## Supplemental File 1. Mathematical Modeling: Equations and Parameters

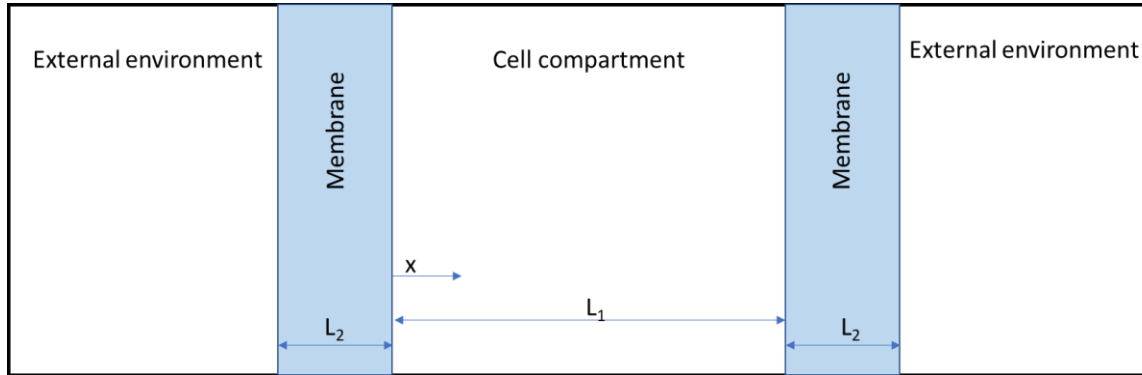

Consider a 1 cm x 1 cm x 150  $\mu\text{m}$  construct. For islet equivalents (IEQs) of 150  $\mu\text{m}$  diameter, the maximum number of IEQs in the construct is  $(10^4/150)^2 = 4444$  IEQs or, approximately, 4000 IEQs.

Assume that each IEQ contains 10.4 ng of DNA. Therefore, the density in the construct is  $(4000/0.015) = 2.67 \times 10^5$  IEQs/mL, or  $2.77 \times 10^6$  ng DNA/mL.

### Mathematical Model

For simplicity, we assume a homogeneous cell compartment. This is a good approximation for 4000 IEQs per construct, which fill most of the construct volume. At steady state:

$$D \frac{d^2 C}{dx^2} - \frac{VC}{K+C} N = 0$$

#### Boundary conditions

$$\text{At } x=0, D_M \frac{\alpha C_B - \alpha C}{L_2} = -D \frac{dC}{dx}$$

$$\text{At } x=L_1/2, dC/dx = 0$$

#### Symbols

- $N$  cell density
- $L_1$  thickness of cell compartment
- $L_2$  thickness of each membrane
- $C$  concentration of dissolved oxygen
- $C_B$  concentration of dissolved oxygen in the surrounding medium
- $V, K$  Monod model parameters for oxygen consumption by the cells
- $D$  Diffusivity of dissolved oxygen in the cell compartment

$\alpha * D_M$  Partition coefficient of dissolved oxygen in membrane times diffusivity of dissolved oxygen in membrane (these parameters appear only as a product in the model)

**Parameter values**

$$N = 2.77 \times 10^6 \text{ ng DNA/mL}$$

$$L_1 = 150 \text{ } \mu\text{m} = 0.015 \text{ cm}$$

$$L_2 = 20 \text{ } \mu\text{m} = 0.002 \text{ cm}$$

$$K = 1 \times 10^{-5} \text{ mmol/mL}$$

$$V = 125 \text{ nmol oxygen/(mg DNA*min)} = \\ 2.08 \times 10^{-12} \text{ mmol oxygen/(ng DNA*s)}$$

$$D = 9.9 \times 10^{-6} \text{ cm}^2/\text{s (from Suszynski et al[1])}$$

$$\alpha * D_M = 3.89 \times 10^{-6} \text{ cm}^2/\text{s (measured in the Papas lab for Biopore membranes, unpublished)}$$

---

[1] T.M. Suszynski, E.S. Avgoustiniatos, K.K. Papas, Oxygenation of the Intraportally Transplanted Pancreatic Islet, *J Diabetes Res*, 2016 (2016) 7625947.
